# Supplementary material
Source: bioRxiv or medRxiv preprint supplement (https://www.biorxiv.org/highwire/filestream/47047/field_highwire_adjunct_files/1/137695-10.pdf)
Supplement: Supplementary file [file 137695-10.pdf]

**Table S3:** Primers used in this study. Related to STAR methods

| Name                  | Sequences (5'_3')                                            |
|-----------------------|--------------------------------------------------------------|
| RomR-sfGFP-1          | CCGGAATTCCAGAAGTCCAACACGATGCC                                |
| RomR-sfGFP-2          | TTCTTCACCTTTAGAGTGCTGGGTCTCTCGGTC                            |
| RomR-sfGFP-3          | CGAGAGACCCAGCACTCTAAAGGTGAAGAACTG                            |
| RomR-sfGFP-4          | ACGGCGCCAGGCGCCTTATTTGTAGAGCTCATC                            |
| RomR-sfGFP-5          | GAGCTCTACAAATAAGGCGCCTGGCGCCGTAAC                            |
| RomR-sfGFP-6          | CAGCTATGACATGATTACAAGCTTGATGATGGGAATCTCGCGGC                 |
| FrzZ-mcherry-1        | CGCGGATCCTGGTCATTGATGACAGCCCG                                |
| FrzZ-mcherry-2        | CCCACCGGTAACGAGATGGTGAGCAAGGGCGAG                            |
| FrzZ-mcherry-3        | GCCCTTGCTCACCATCTCGTTACCGGTGGGCAT                            |
| FrzZ-mcherry-4        | CCGGAATTCTTACTTGTACAGCTCGTCCA                                |
| FrzXD55A-F            | GACCTCATCCTCACCGCCATCCACATGCCCGAG                            |
| FrzXD55A-R            | CTCGGGCATGTGGATGGCGGTGAGGATGAGGTC                            |
| FrzX EcoRI-F          | CCGGAATTCAGGGTCCATCTGTACAGGTG                                |
| FrzX BamHI-R          | CGCGGATCCGAGGAAGGCACGCATGGGAT                                |
| RD53E-1F              | CAAGCTTTTCCGCATGATCAGGTGCTG                                  |
| RD53E-1R&2F           | GTCCTCGCGGAAGTCATGAT                                         |
| RD53E-2R              | GCTCTAGATTCAGTGGTATCGGTCATTG                                 |
| RD53N-1R&2F           | GTCCTCGCGAACGTCATGAT                                         |
| sfGFP-linker-FrzX -1F | CCTGCAGGTCGACTCTAGAGGATCCAGGGTCCATCTGTACAGGTG                |
| sfGFP-linker-FrzX -1R | AGTTCTTCACCTTTAGACATGGCGACCTTCCTTCACTCCTTTATC                |
| sfGFP-linker-FrzX -2F | GATAAAGGAGTGAAGGAAGGTCGCCATGTCTAAAGGTGAAGAACT                |
| sfGFP-linker-FrzX -2R | CCTTATGCGTCTGCGCAGCCTAGGCAAGATCCGGCTGGTCTGTTTGTAGAGCTCATCCAT |
| sfGFP-linker-FrzX -3F | GCCTAGGCTGCGCAGACGCATAAGGTCCGAGAAGCGAAGAATCCT                |
| sfGFP-linker-FrzX -3R | CAGCTATGACCATGATTACGAATTCTCACCAGAGGATGCTCTGCA                |
